# Supplementary material for: Insight into enhanced photocatalytic properties of a type-II MoS2/ZnO heterostructure and tuning its properties and interfacial charge transfer by strain
Source: Royal Society of Chemistry journal article supplement (doi:10.1039/d2nj05606b), 2023-01-01
Supplement: d2nj05606b1.pdf [file d2nj05606b1.pdf]

# An Insight into Enhanced Photocatalytic Properties of a Type-II MoS<sub>2</sub>/ZnO Heterostructure and Tuning their Properties and Interfacial Charge Transfer by Strain

Dipali Nayak, R. Thangavel\*

*Condensed Matter Physics Laboratory, Department of Physics,  
 Indian Institute of Technology (Indian School of Mines),  
 Dhanbad-826004, Jharkhand, India*

\*rthangavel@iitism.ac.in

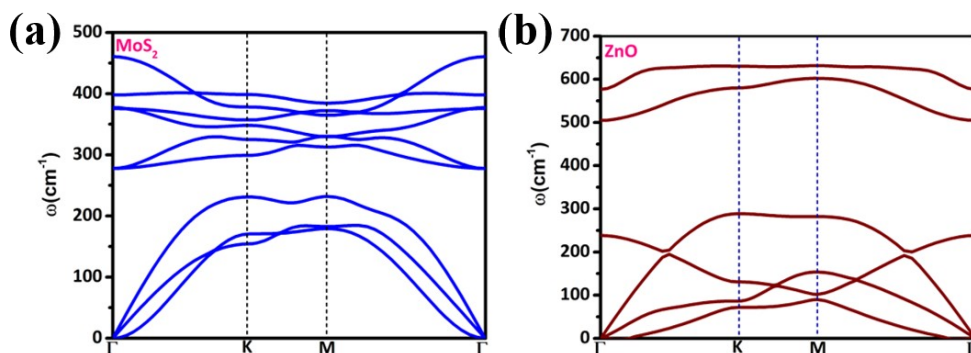

**Figure S1:** The calculated phonon band structure of the MoS<sub>2</sub> and ZnO monolayers.

**Table S1:** Summary of the reported MoS<sub>2</sub> and ZnO-based heterostructures and their parameters.

| vdW heterostructure   | Band alignment | CBO (eV) | VBO (eV) | $\Delta G_H$ (eV) | Mobility (cm <sup>2</sup> V <sup>-1</sup> s <sup>-1</sup> ) |         | Bandgap tuning  | Ref.      |
|-----------------------|----------------|----------|----------|-------------------|-------------------------------------------------------------|---------|-----------------|-----------|
|                       |                |          |          |                   | electron                                                    | hole    |                 |           |
| MoS <sub>2</sub> /ZnO | Type-II        | 1.55     | 0.57     | -0.03             | 820                                                         | 200     | Strain          | This work |
| MoS <sub>2</sub> /ZnO | Type-II        | 2.49     | 0.58     | -                 | -                                                           | -       | -               | 1         |
| MoS <sub>2</sub> /ZnO | Type-II        | 2.49     | 0.58     | -                 | -                                                           | -       | -               | 2         |
| ZnO/WSe <sub>2</sub>  | Type-II        | -        | -        | -                 | 480.32                                                      | 1213.29 | Strain          | 3         |
| WS <sub>2</sub> /ZnO  | Type-II        | 0.97     | 0.34     | -                 | -                                                           | -       | Strain          | 4         |
| ZnO/SeMoS             | Type-II        | 0.86     | 0.11     | -                 | -                                                           | -       | Vertical strain | 5         |

|                           |          |      |      |   |        |        |                    |    |
|---------------------------|----------|------|------|---|--------|--------|--------------------|----|
|                           |          |      |      |   |        |        | and electric field | 6  |
| BlueP/MoS <sub>2</sub>    | Type-II  | 0.79 | 0.44 | - | -      | -      | -                  | 6  |
| InSe/MoS <sub>2</sub>     | Type-II  | -    | -    | - | -      | -      | Strain             | 7  |
| g-ZnO/2H-MoS <sub>2</sub> | Z-scheme | -    | -    | - | -      | -      | -                  | 8  |
| MoS <sub>2</sub> /ZnO     | Type-II  | -    | 1.1  | - | -      | -      | Electric field     | 9  |
| GaN/ZnO                   | Type-II  | -    | -    | - | -      | -      | Strain             | 10 |
| AlN/ZnO                   | Type-II  | -    | -    | - | -      | -      | Strain             | 10 |
| MoS <sub>2</sub> /BP      | Type-I   | 0.17 | 0.73 | - | -      | -      | -                  | 11 |
| MoS <sub>2</sub> /BSe     | Type-I   | 1.09 | 0.25 | - | 358.22 | 188.60 | -                  | 12 |
| MoS <sub>2</sub> /BP      | Type-II  | 0.13 | 0.91 | - | 990    | 27670  | Strain             | 13 |

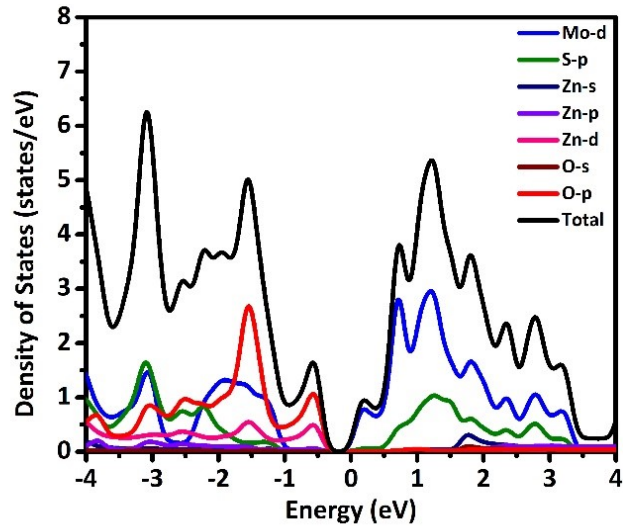

**Figure S2:** The calculated PDOS plot of the MoS<sub>2</sub>/ZnO conf-5 heterostructure.

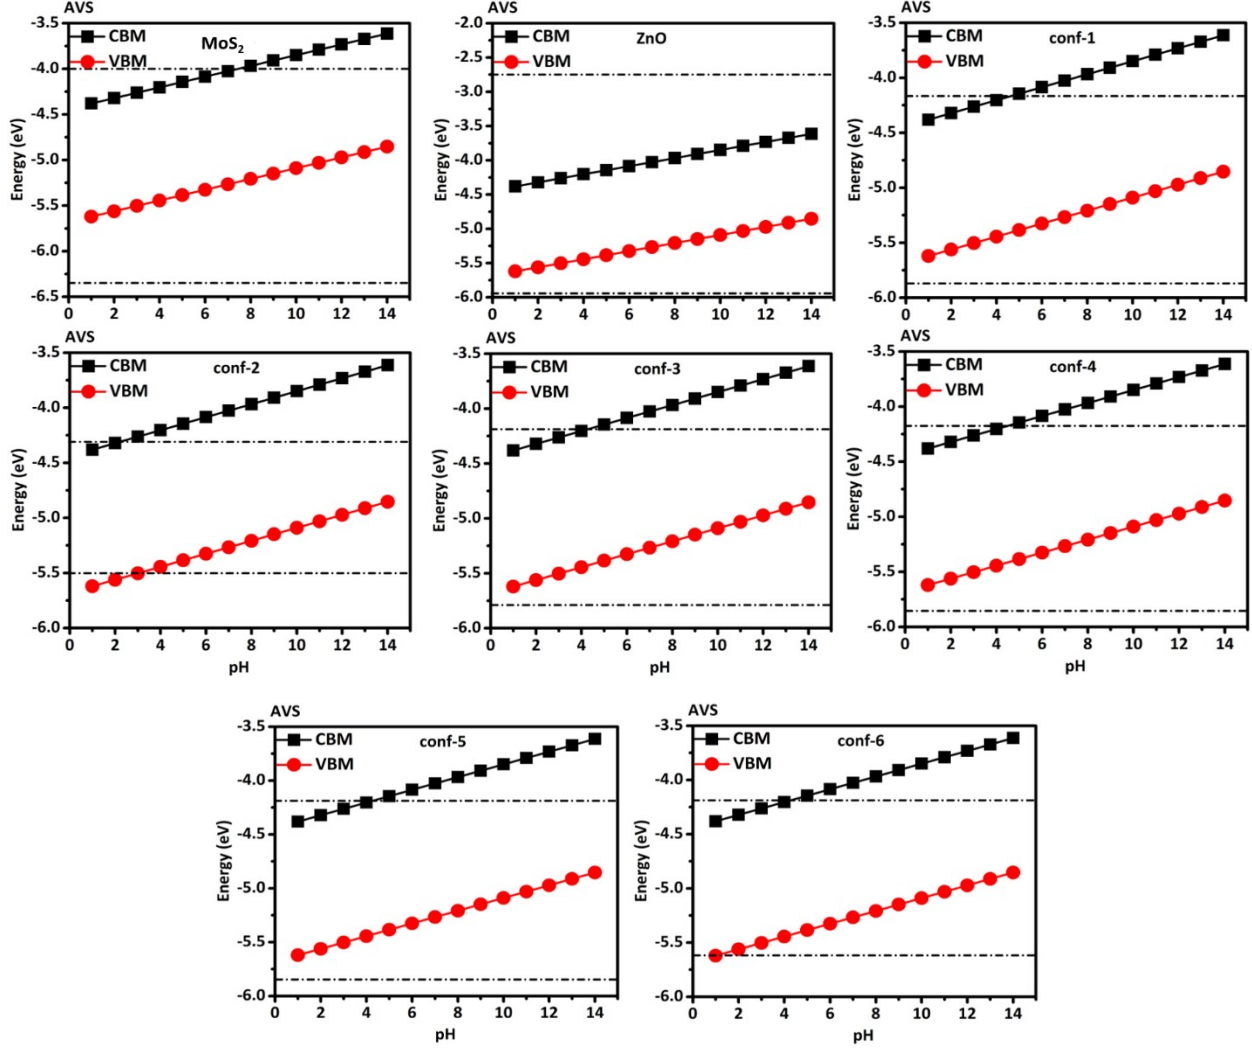

**Figure S3:** The effect of pH on the water redox potentials for the MoS<sub>2</sub>, ZnO monolayers and heterostructures with six stacking patterns.

### Text S1: Hydrogen evolution reaction (HER)

To describe the catalytic activity of any semiconductor, the exchange current density (ECD) is a crucial parameter for determining the efficiency of H<sub>2</sub> and O<sub>2</sub> generation in the water-splitting process. The adsorption free energy (AFE) of hydrogen or oxygen atoms directly relates to the ECD. Furthermore, the AFE is the most acceptable descriptor for evaluating the catalytic activity of photocatalysts for their use in the overall water splitting. The hydrogen adsorption energy ( $E_H$ ) is obtained by the equation

$$\Delta E_H = E_{tot}\left(\text{MoS}_2/\text{ZnO} + \text{H}\right) - E_{tot}\left(\text{MoS}_2/\text{ZnO}\right) - \frac{1}{2}E(\text{H}_2)$$

Where,  $E_{tot}(\text{MoS}_2/\text{ZnO} + \text{H})$ ,  $E_{tot}(\text{MoS}_2/\text{ZnO})$  and  $E(\text{H}_2)$  are the energies of the MoS<sub>2</sub>/ZnO heterostructure with adsorbed hydrogen, MoS<sub>2</sub>/ZnO heterostructure and hydrogen molecule respectively. The Gibb's free energy for the hydrogen adsorption is calculated by the equation;

$$\Delta G_H = \Delta E_H + \Delta E_{ZPE} - T\Delta S_H$$

$\Delta E_{ZPE}$  depicts the zero-point energy difference of the H<sub>2</sub> between adsorbed and the gas phase state;  $\Delta S_H$  represents the entropy difference between the H<sub>2</sub> gas phase state and adsorbed state. The value of  $\Delta E_{ZPE}$  is around 0.04 eV for the HER study. Moreover, From the previous reports,  $\Delta E_{ZPE} - T\Delta S_H = 0.24 \text{ eV}$  is the acceptable value. The criterion of a semiconductor to be a great photocatalyst for HER activity is that the  $\Delta G_H$  is close to zero. In addition, according to the reported literature, the optimum value of  $\Delta G_H$  lies between  $|\Delta G_H| \leq 0.25 \text{ eV}$  for an excellent HER activity<sup>14,15</sup>.

A  $3 \times 3 \times 1$  supercell of the MoS<sub>2</sub>/ZnO heterostructure is adopted for the study of hydrogen adsorption. We considered four different sites on the basal plane of the heterostructure for hydrogen adoption, i) Mo top, ii) S top, iii) Zn top and iv) O top. [Figure S4](#) depicts the H adsorption on the surface of the MoS<sub>2</sub>/ZnO heterostructure. Firstly, the distance between the H atom from the various sites is varied and optimized values are obtained. After that, the AFE is calculated for each site. The calculated values of  $\Delta G_H$  and the optimized distance of the H atom from the heterostructure surface ( $d_{\text{surface-H}}$ ) is listed in [Table S2](#).

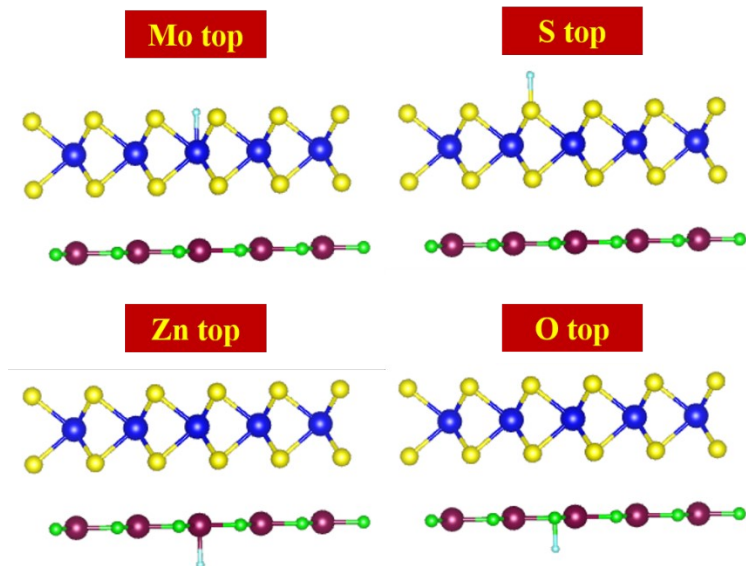

**Figure S4:** Different hydrogen adsorption sites on the surface of the heterostructure.

**Table S2:** The optimized surface to adsorbed hydrogen atom distance and  $\Delta G_H$  for different hydrogen adsorption site.

| Hydrogen adsorption site | $d_{\text{surface-H}}$ (Å) | $\Delta G_H$ (eV) |
|--------------------------|----------------------------|-------------------|
| Mo top                   | 1.8                        | 0.21              |
| S top                    | 1.6                        | -0.03             |
| Zn top                   | 1.8                        | 0.45              |
| O top                    | 1.4                        | 0.16              |

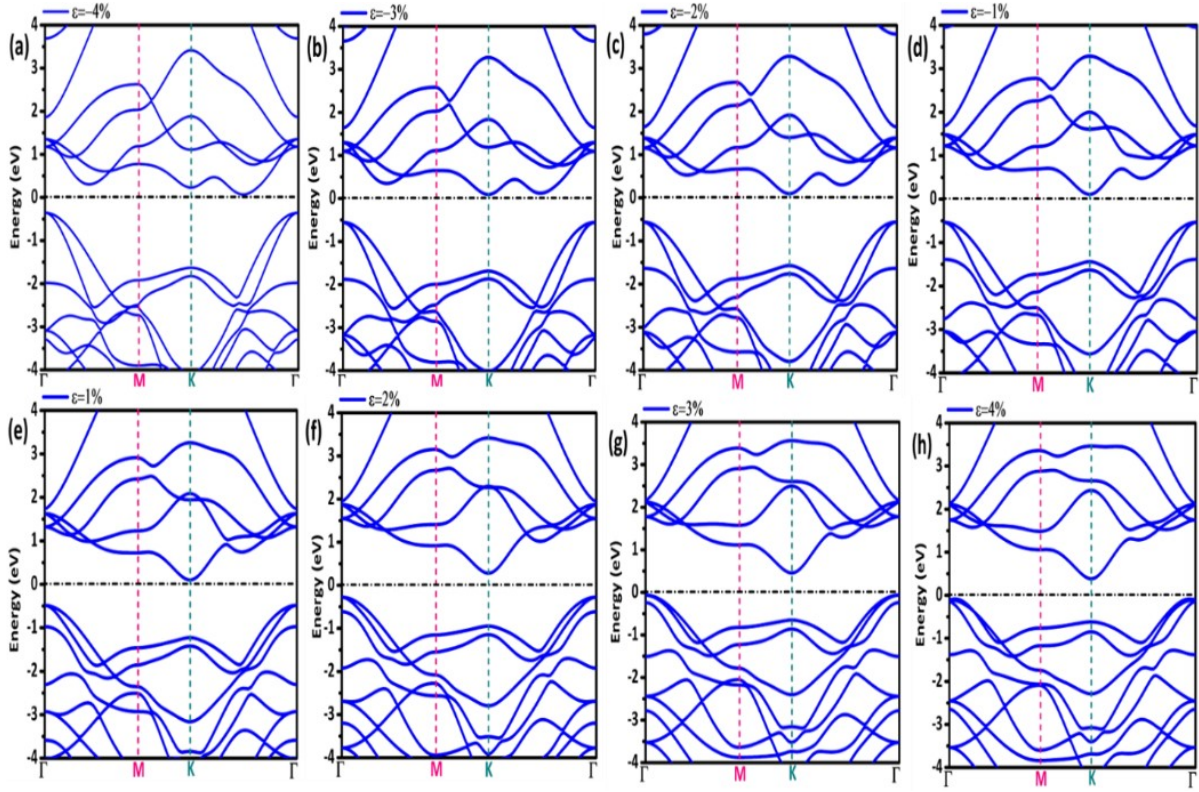

Figure S5: The electronic band structure of the MoS<sub>2</sub>/ZnO heterostructure under biaxial strain.

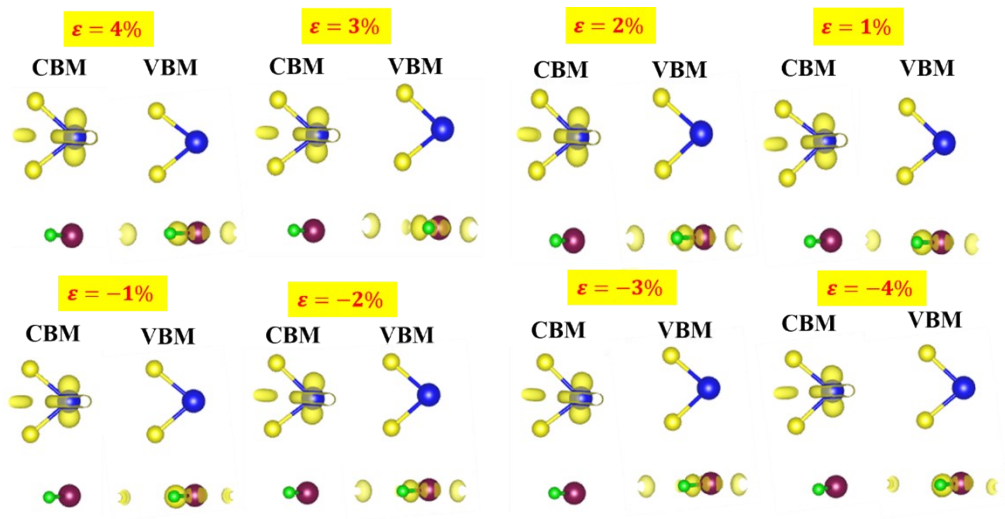

Figure S6: The partial charge density of the CBM and VBM of the MoS<sub>2</sub>/ZnO heterostructure under biaxial strain.



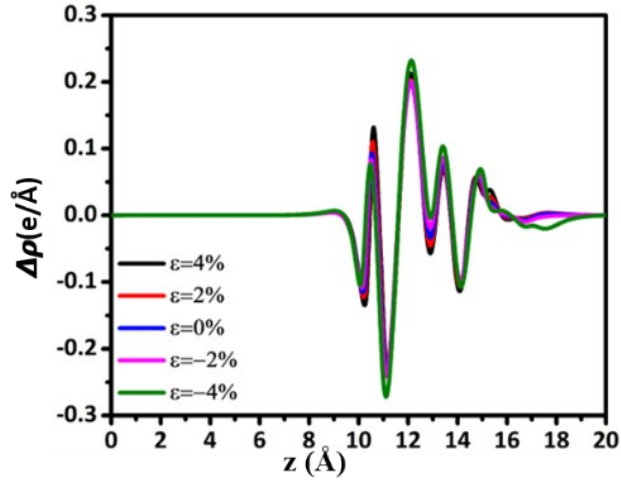

Figure S7: The CDD plot of the heterostructure under biaxial strain.

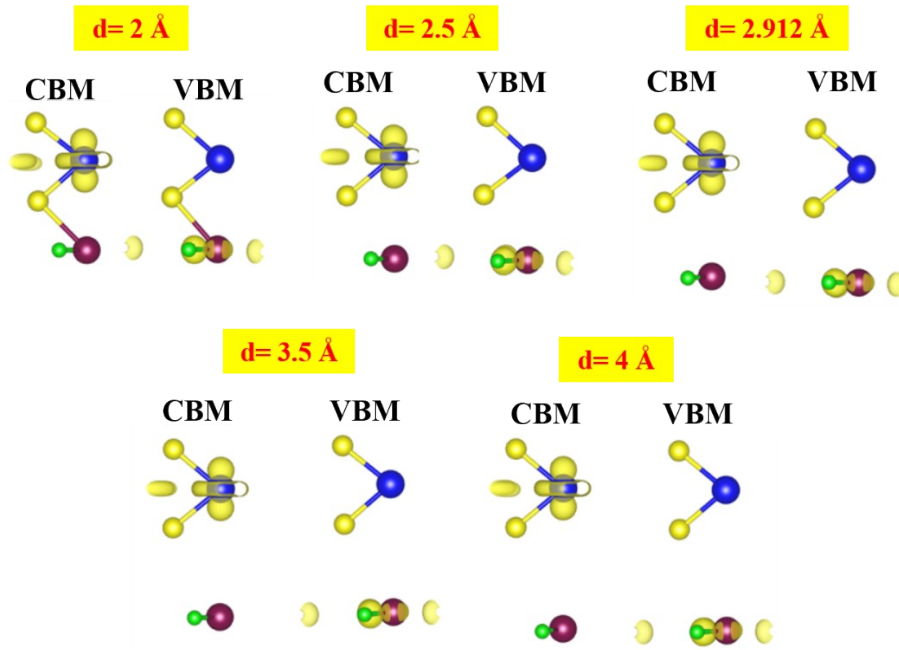

Figure S8: The band decomposed charge density of the MoS<sub>2</sub>/ZnO heterostructure with the variation of the interlayer distance.

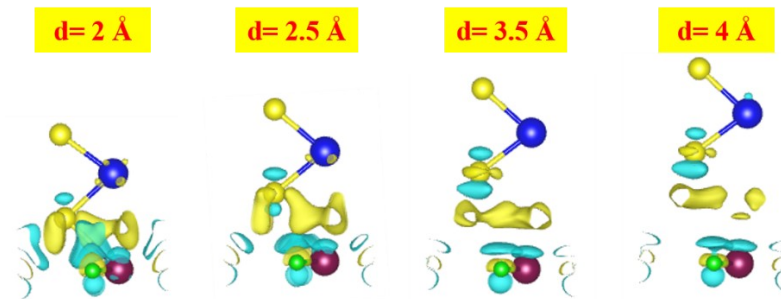

**Figure S9:** Calculated CDD isosurfaces of the MoS<sub>2</sub>/ZnO heterostructure with the variation of interlayer distance.

**Table S3:** XYZ files of MoS<sub>2</sub> and ZnO monolayers, MoS<sub>2</sub>/ZnO heterostructure with six configurations.

|                                   | Element | X            | Y            | Z            |
|-----------------------------------|---------|--------------|--------------|--------------|
| MoS <sub>2</sub>                  | Mo      | 0.666667118  | 0.333332882  | 0.750000000  |
|                                   | S       | 0.333331441  | 0.666668559  | 0.828344968  |
|                                   | S       | 0.333331441  | 0.666668559  | 0.671655032  |
| ZnO                               | Zn      | 0.666666000  | 0.333332000  | 0.524659588  |
|                                   | O       | 0.333332000  | 0.666666000  | 0.524648487  |
| MoS <sub>2</sub> /ZnO<br>(conf-1) | Mo      | 0.6664298050 | 0.3330758083 | 0.7500614771 |
|                                   | S       | 0.3331518506 | 0.6664611202 | 0.8275589922 |
|                                   | S       | 0.3330813997 | 0.6663910823 | 0.6726417600 |
|                                   | Zn      | 0.6836553252 | 0.3503678654 | 0.5102406341 |
|                                   | O       | 0.3504216195 | 0.6837841238 | 0.5078071366 |
| MoS <sub>2</sub> /ZnO<br>(conf-2) | Mo      | 0.673398775  | 0.339813472  | 0.748844428  |
|                                   | S       | 0.340065785  | 0.673145221  | 0.826214123  |
|                                   | S       | 0.340064801  | 0.673145292  | 0.671774619  |
|                                   | Zn      | 0.339938199  | 0.673656594  | 0.524666218  |
|                                   | O       | 0.673272440  | 0.340319422  | 0.521810611  |
| MoS <sub>2</sub> /ZnO<br>(conf-3) | Mo      | 0.668112348  | 0.334064134  | 0.749118813  |
|                                   | S       | 0.334726452  | 0.667367221  | 0.826588069  |
|                                   | S       | 0.334738371  | 0.667373329  | 0.671805219  |
|                                   | Zn      | 0.009082965  | 0.004539000  | 0.523986088  |
|                                   | O       | 0.675609864  | 0.337796316  | 0.521811812  |
| MoS <sub>2</sub> /ZnO<br>(conf-4) | Mo      | 0.6660769289 | 0.3321577424 | 0.7504260592 |
|                                   | S       | 0.3327531684 | 0.6655102900 | 0.8279307821 |
|                                   | S       | 0.3327063087 | 0.6654166097 | 0.6730034820 |



|                                   |    |              |              |              |
|-----------------------------------|----|--------------|--------------|--------------|
|                                   | Zn | 0.0064249564 | 0.0128486600 | 0.5096592458 |
|                                   | O  | 0.3398386375 | 0.6796766979 | 0.5072904308 |
| MoS <sub>2</sub> /ZnO<br>(conf-5) | Mo | 0.671183846  | 0.335605068  | 0.748236609  |
|                                   | S  | 0.337869016  | 0.668950663  | 0.825705623  |
|                                   | S  | 0.337844867  | 0.668930427  | 0.671008563  |
|                                   | Zn | 0.671033174  | 0.335497643  | 0.525130655  |
|                                   | O  | 0.004339097  | 0.002156199  | 0.523228549  |
| MoS <sub>2</sub> /ZnO<br>(conf-6) | Mo | 0.669049994  | 0.338106480  | 0.747996052  |
|                                   | S  | 0.335704383  | 0.671444390  | 0.825437599  |
|                                   | S  | 0.335726104  | 0.671429995  | 0.670975027  |
|                                   | Zn | 0.335322671  | 0.670619889  | 0.525841533  |
|                                   | O  | 0.001996848  | 0.003969247  | 0.523059789  |

## References

- 1 S. Wang, H. Tian, C. Ren, J. Yu and M. Sun, *Sci Rep*, 2018, **8**, 12009-12015.
- 2 S. Wang, C. Ren, H. Tian, J. Yu and M. Sun, *Physical Chemistry Chemical Physics*, 2018, **20**, 13394–13399.
- 3 F. Hu, L. Tao, H. Ye, X. Li and X. Chen, *J Mater Chem C Mater*, 2019, **7**, 7104–7113.
- 4 Y. Guan, H. Yao, H. Zhan, H. Wang, Y. Zhou and J. Kang, *RSC Adv*, 2021, **11**, 14085–14092.
- 5 P. Wang, Y. Zong, H. Liu, H. Wen, Y. Liu, H. bin Wu and J. B. Xia, *Physical Chemistry Chemical Physics*, 2021, **23**, 1510–1519.
- 6 F. Yang, J. Han, L. Zhang, X. Tang, Z. Zhuo, Y. Tao, X. Cao and Y. Dai, *Nanotechnology*, 2020, **30**, 375706-375715.
- 7 J. Zhang, X. Y. Lang, Y. F. Zhu and Q. Jiang, *Physical Chemistry Chemical Physics*, 2018, **20**, 17574–17582.
- 8 T. Ouyang, J. Guo, H. Shen, M. Mu, Y. Shen and X. Yin, *Nanoscale*, 2021, **13**, 18192–18200.
- 9 N. K. Sharma, S. Sahoo, M. C. Sahu, S. K. Mallik, A. K. Jena, H. Sharma, S. K. Gupta, R. Ahuja and S. Sahoo, *Surfaces and Interfaces*, 2022, **29**, 101817-101827.

- 10 Z. Zhang, B. Huang, Q. Qian, Z. Gao, X. Tang and B. Li, *APL Mater*, 2020, **8**, 041114-041123.
- 11 K. Ren, M. L. Sun, Y. Luo, S. K. Wang, J. Yu and W. C. Tang, *Appl Surf Sci*, 2019, **476**, 70–75.
- 12 Y. Luo, K. Ren, S. Wang, J. P. Chou, J. Yu, Z. Sun and M. Sun, *Journal of Physical Chemistry C*, 2019, **123**, 22742–22751.
- 13 M. K. Mohanta, A. Rawat, N. Jena, Dimple, R. Ahammed and A. de Sarkar, *ACS Appl Mater Interfaces*, 2020, **12**, 3114–3126.
- 14 P. Sikam, T. Jitwatanasirikul, T. Roongcharoen, N. Yodsinn, J. Meeprasert, K. Takahashi and S. Namuangruk, *Physical Chemistry Chemical Physics*, 2022, **24**, 12909–12921.
- 15 N. K. Oh, J. Seo, S. Lee, H. J. Kim, U. Kim, J. Lee, Y. K. Han and H. Park, *Nat Commun*, 2021, **12**, 4606-4618.
